# Supplementary material for: Fe(II), Mn(II), and Zn(II) Binding to the C-Terminal Region of FeoB Protein: An Insight into the Coordination Chemistry and Specificity of the Escherichia coli Fe(II) Transporter
Source: PubMed Central journal article supplement (PMC10647171; doi:10.1021/acs.inorgchem.3c02910), 2023-11-01
Supplement: ic3c02910_si_001.pdf [file ic3c02910_si_001.pdf]

Supporting information for:

**Fe(II), Mn(II), and Zn(II) Binding to the C-Terminal Region of FeoB Protein: An Insight into the Coordination Chemistry and Specificity of the *E. coli* Fe(II) Transporter**

**Bartosz Orzel, Alessio Pelucelli, Malgorzata Ostrowska, Slawomir Potocki, Henryk Kozlowski, Massimiliano Peana, and Elzbieta Gumienna-Kontecka\***

Bartosz Orzel – Faculty of Chemistry, University of Wrocław, 50-383 Wrocław, Poland; <https://orcid.org/0000-0001-9299-1697>

Alessio Pelucelli - Department of Chemical, Physical, Mathematical and Natural Sciences, University of Sassari, 07100 Sassari, Italy; <https://orcid.org/0000-0002-9502-7585>

Malgorzata Ostrowska - Faculty of Chemistry, University of Wrocław, 50-383 Wrocław, Poland; <https://orcid.org/0000-0001-9765-8914>

Henryk Kozlowski - Faculty of Chemistry, University of Wrocław, 50-383 Wrocław, Poland; Department of Health Sciences, University of Opole, Katowicka 68, 45-060 Opole, Poland; [orcid.org/0000-0001-5769-8583](https://orcid.org/0000-0001-5769-8583)

Slawomir Potocki - Faculty of Chemistry, University of Wrocław, 50-383 Wrocław, Poland; <https://orcid.org/0000-0002-5528-7200>

Massimiliano Peana - Department of Chemical, Physical, Mathematical and Natural Sciences, University of Sassari, 07100 Sassari, Italy; <https://orcid.org/0000-0002-3306-0419>

Elzbieta Gumienna-Kontecka – Faculty of Chemistry, University of Wrocław, 50-383 Wrocław, Poland; [orcid.org/0000-0002-9556-6378](https://orcid.org/0000-0002-9556-6378); Email: [elzbieta.gumienna-kontecka@uwr.edu.pl](mailto:elzbieta.gumienna-kontecka@uwr.edu.pl)

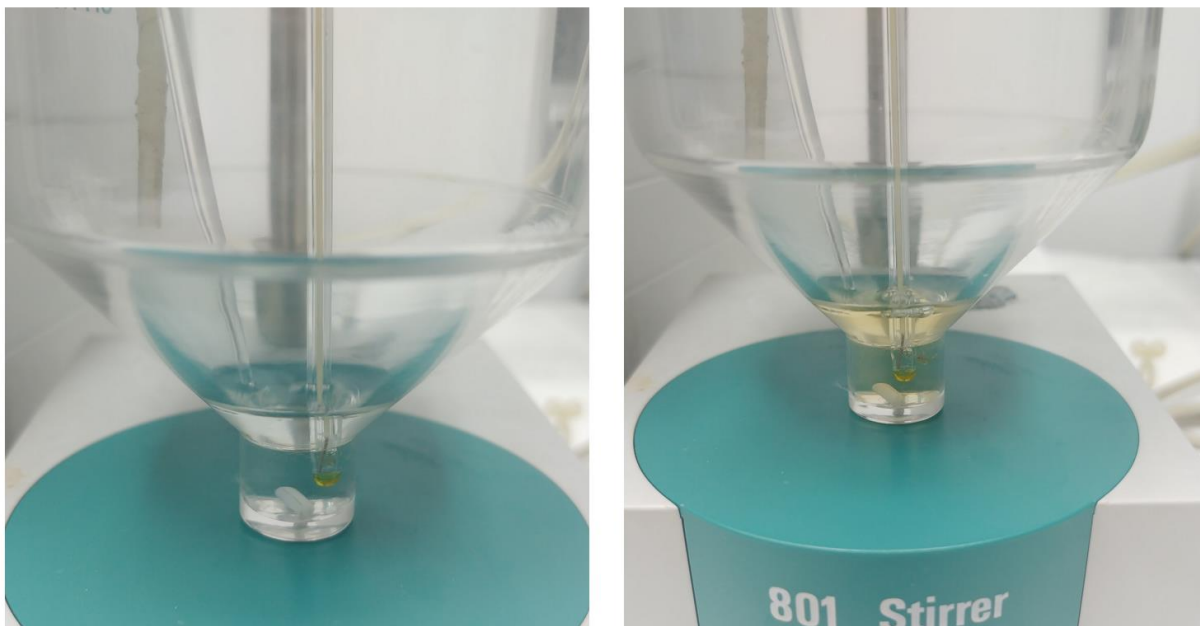

**Figure S1.** Comparison of the sample solution color after finished potentiometric titrations at pH=11. Left picture shows the sample in titration vessel after the finished titration- no color is observed. Right picture shows the sample 30 seconds after opening the vessel to air - yellow color indicates Fe(III) presence.

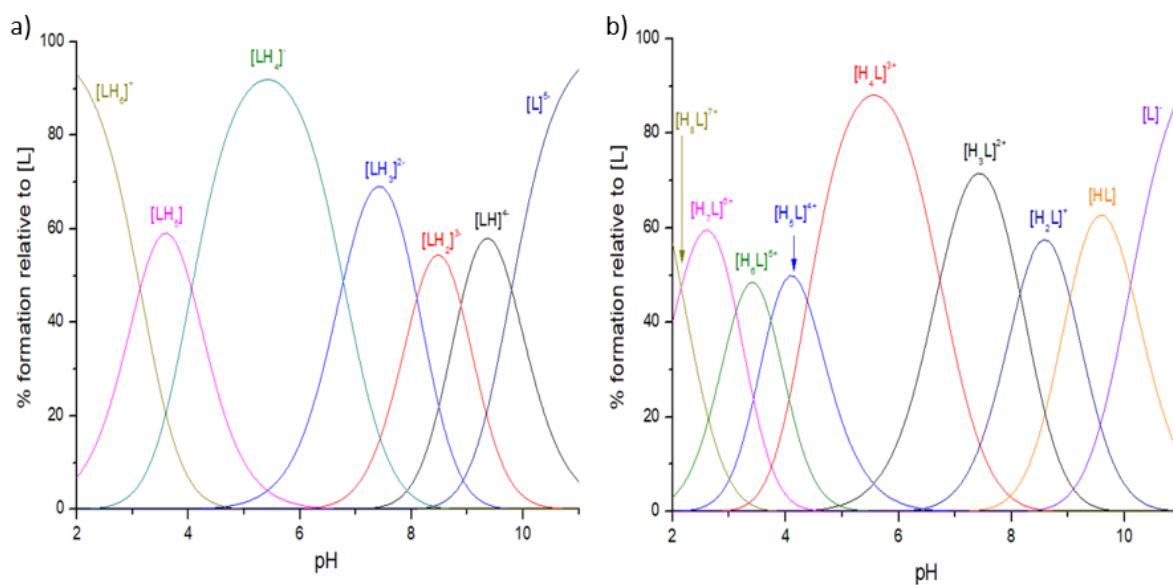

**Figure S2.** Representative distribution diagram for the protonation equilibria of: a)  $\text{Ac}_{763}\text{CCAATTGDCH}_{773}$  (**P1**); b)  $\text{Ac}_{743}\text{RRARSRVDIELLATRKSVSSCCAATTGDCH}_{773}$  (**P2**) at  $T=298\text{ K}$  and  $I=0.1\text{ M NaClO}_4$ .

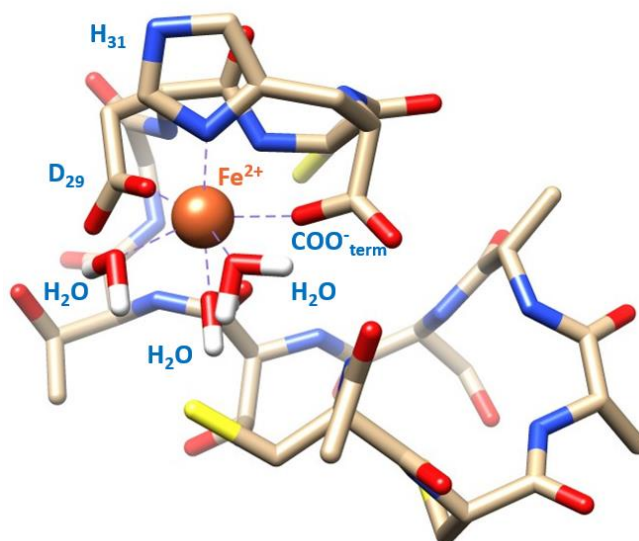

**Figure S3.** Structural model of the [FeH<sub>3</sub>L], species in a {2COO<sup>-</sup>, N<sub>im</sub>, 3H<sub>2</sub>O} coordination mode.

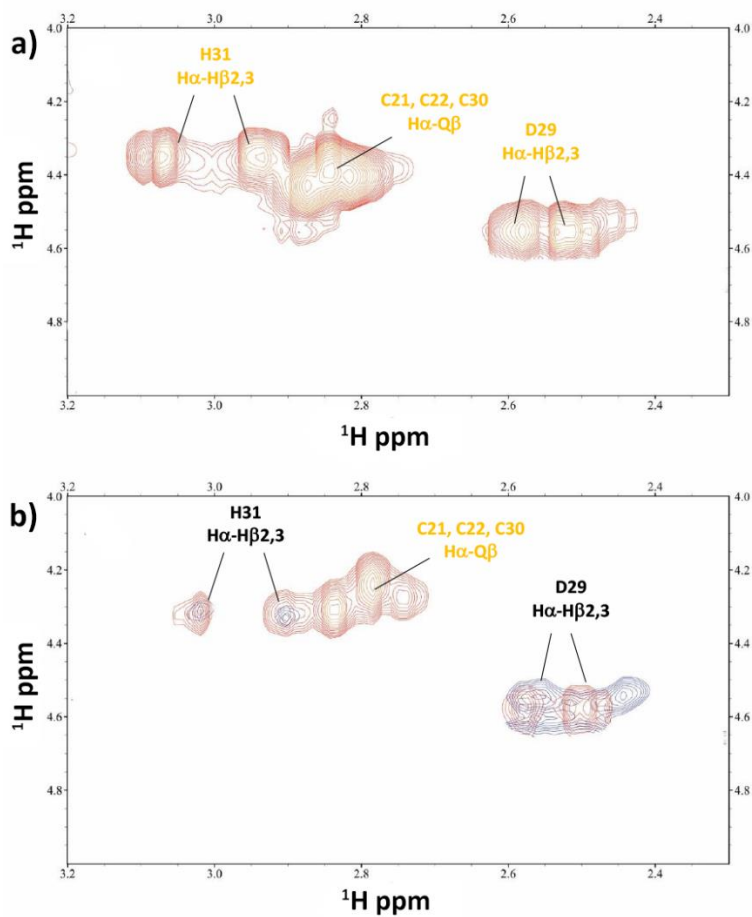

**Figure S4.** Comparison of a selection of <sup>1</sup>H-<sup>1</sup>H TOCSY spectra for the free peptide P1 (red) and Fe(II):P1 system (blue) at 1:3 molar ratio, at pH 8.16 (a) and 9.45 (b).

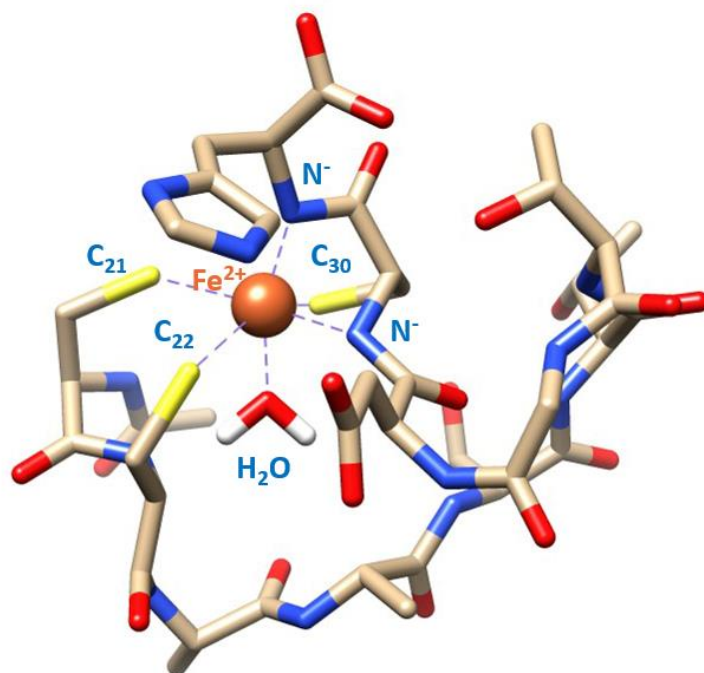

**Figure S5.** A proposed structural model of the  $[\text{FeLH}_2]^{5-}$  species in a  $\{3\text{S}^-, 2\text{N}^-, \text{H}_2\text{O}\}$  coordination mode.

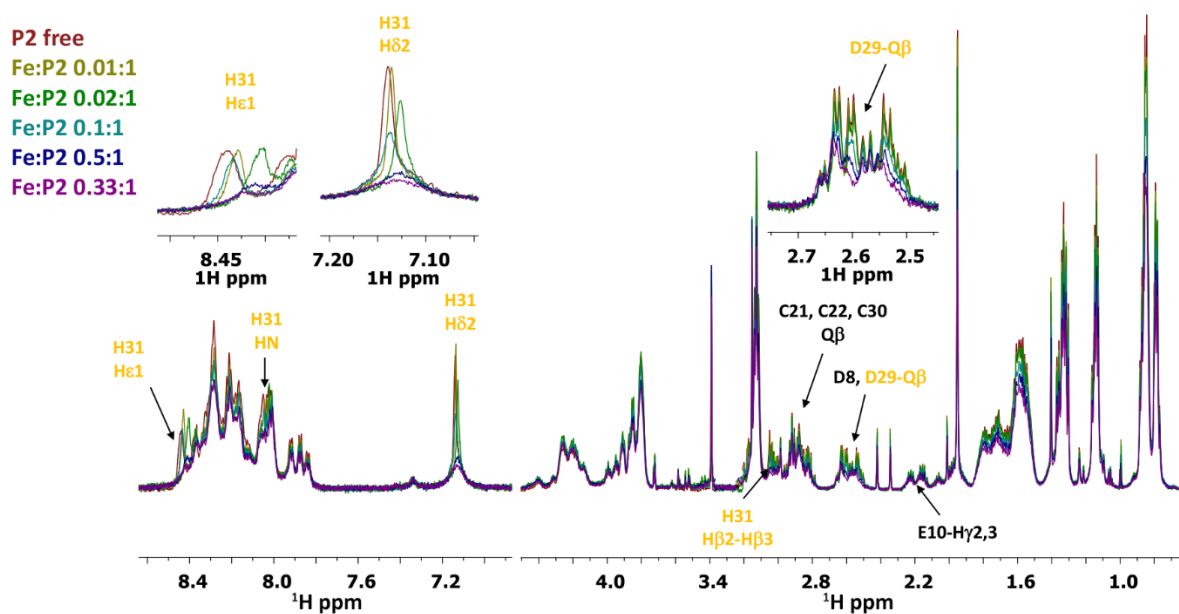

**Figure S6.** Comparison of  $^1\text{H}$  spectra of P2 with increasing addition of Fe(II) at pH 6.2.

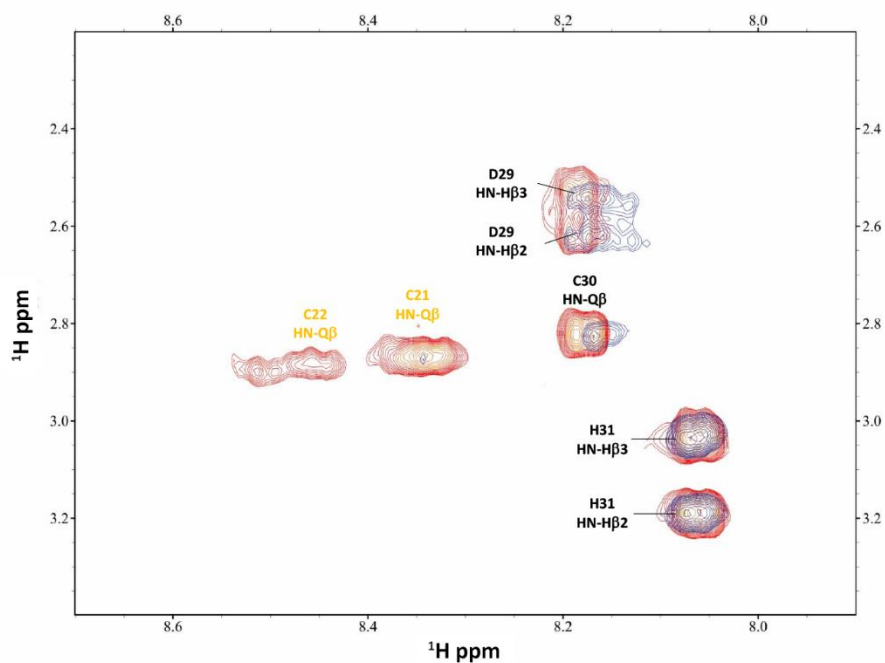

**Figure S7.** Comparison of a selection of  $^1\text{H}$ - $^1\text{H}$  TOCSY spectra for the free peptide P1 (red) and Zn(II):P1 system (blue) at 1:1 molar ratio, at pH 5.4.

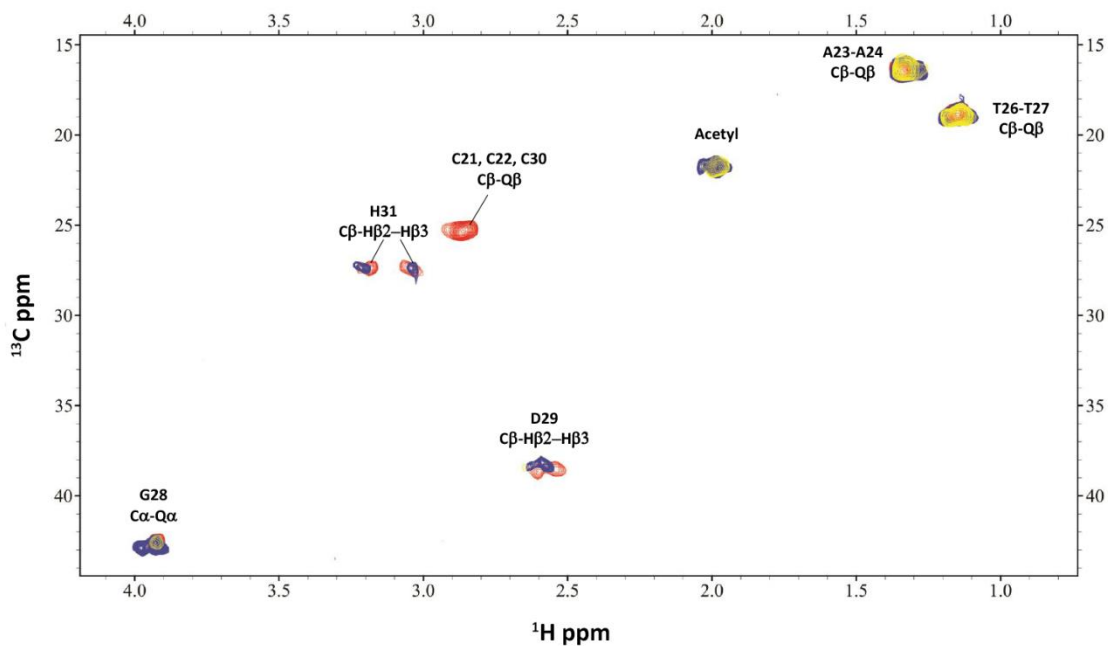

**Figure S8.** Comparison of a selection of  $^1\text{H}$ - $^{13}\text{C}$  HSQC spectra for the free peptide P1 (red) and Zn(II):P1 system 1:1 molar ratio, at pH 5.4 (blue) and at pH 6.1 (yellow).

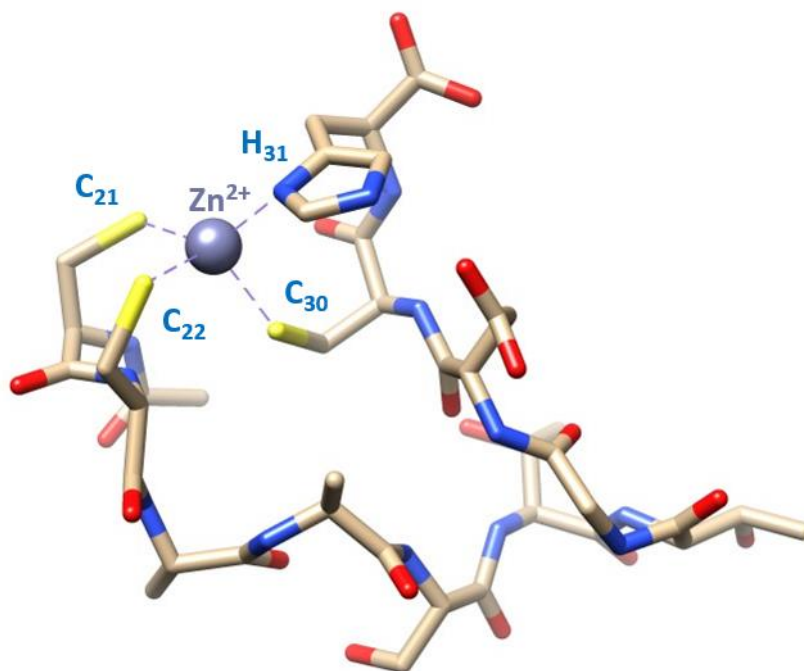

**Figure S9.** Structural model of the  $[ZnL]^{3-}$ , species in a  $\{N_{im}, 3S^{-}\}$  coordination mode.

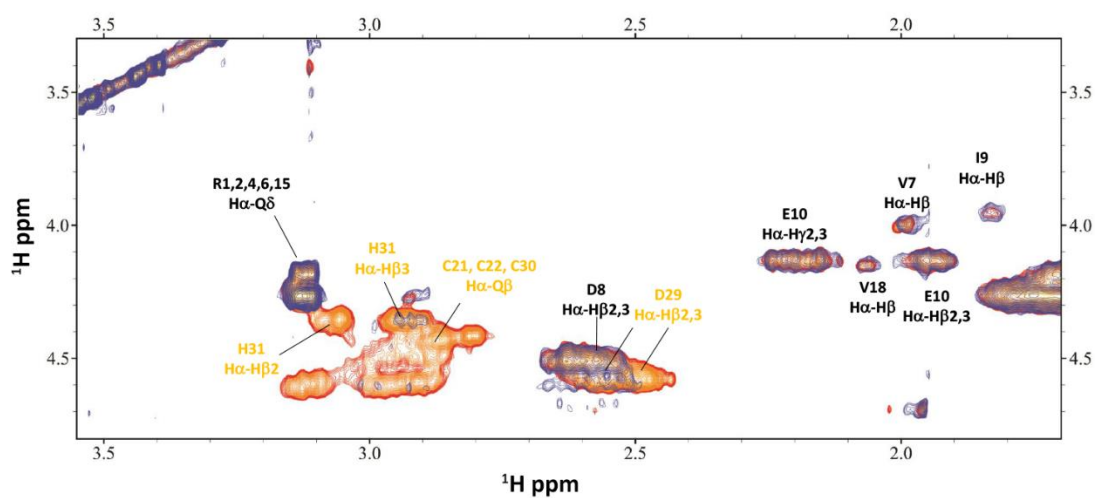

**Figure S10.** Comparison of a selection of  $^1H$ - $^1H$  TOCSY spectra for the free peptide P2 (red) and Zn(II):P2 system (blue) at 1:1 molar ratio, at pH 7.4.

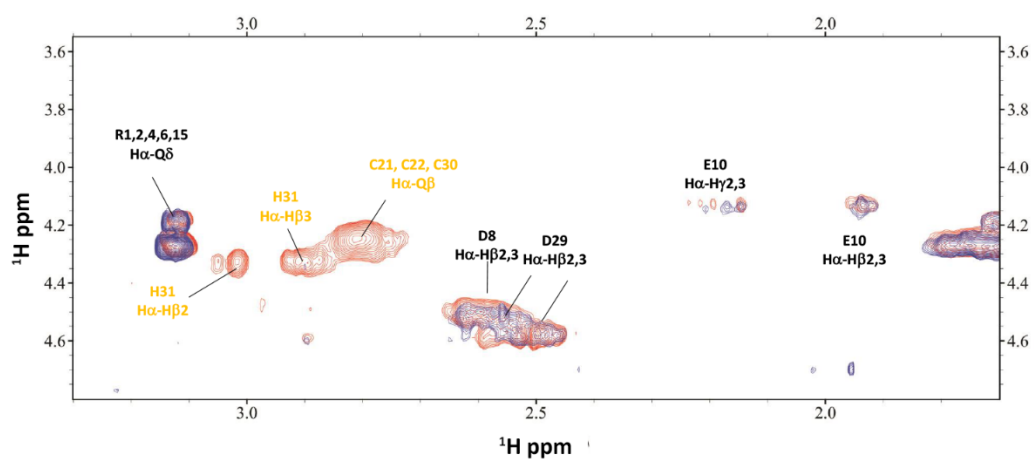

**Figure S11.** Comparison of a selection of  $^1\text{H}$ - $^1\text{H}$  TOCSY spectra for the free peptide P2 (red) and Zn(II):P2 system (blue) at 1:1 molar ratio, at pH 9.3.

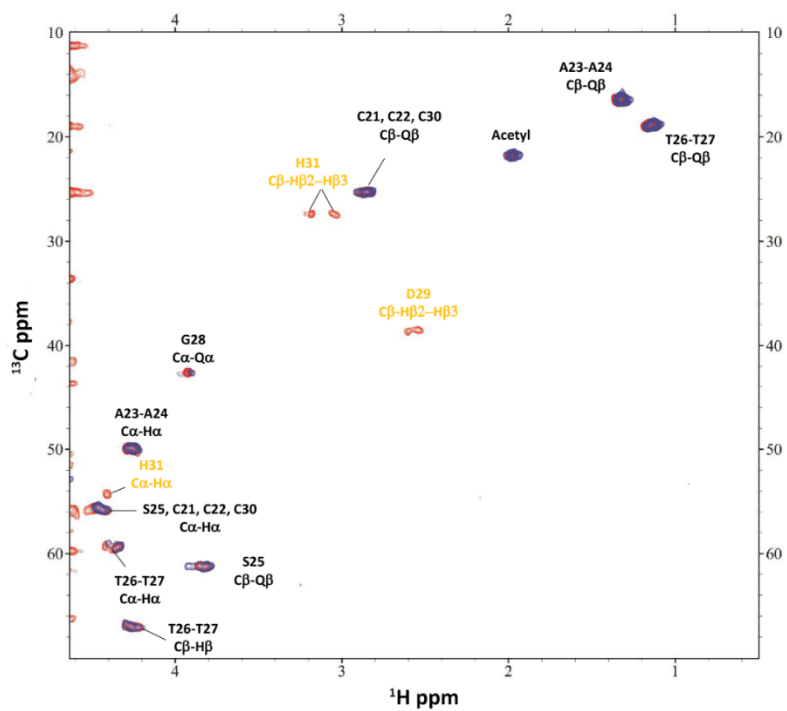

**Figure S12.** Comparison of a selection of  $^1\text{H}$ - $^{13}\text{C}$  HSQC spectra for the free peptide P1 (red) and Mn(II):P1 system (blue) at 0.02:1 molar ratio, at pH 5.0.

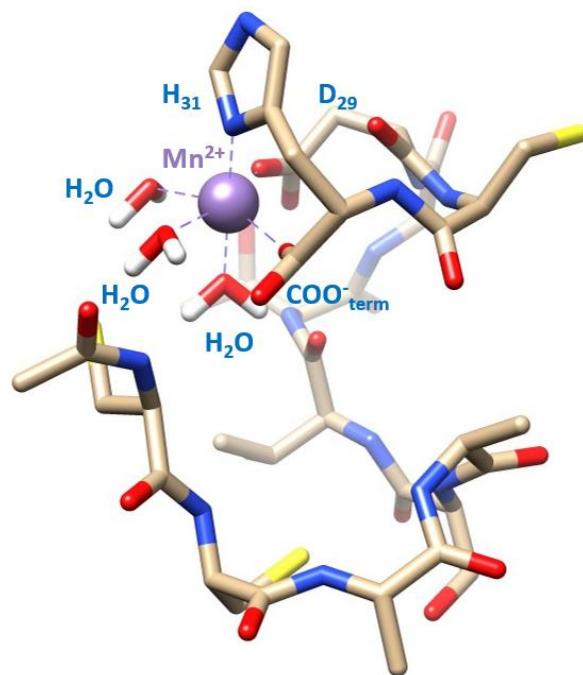

**Figure S13.** Structural model of the  $[MnH_3L]$  species in a  $\{2 COO^-, N_{im}, 3H_2O\}$  coordination mode.

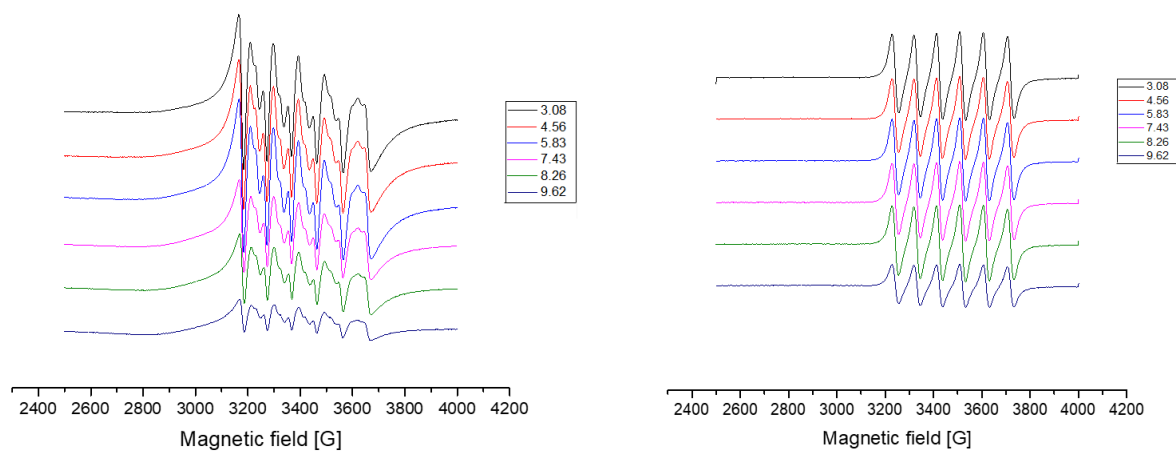

**Figure S14.** EPR spectra of the Mn(II):P1 system as a function of pH in: a)  $T= 77$  K (LN); b)  $T= 298$  K (RT).



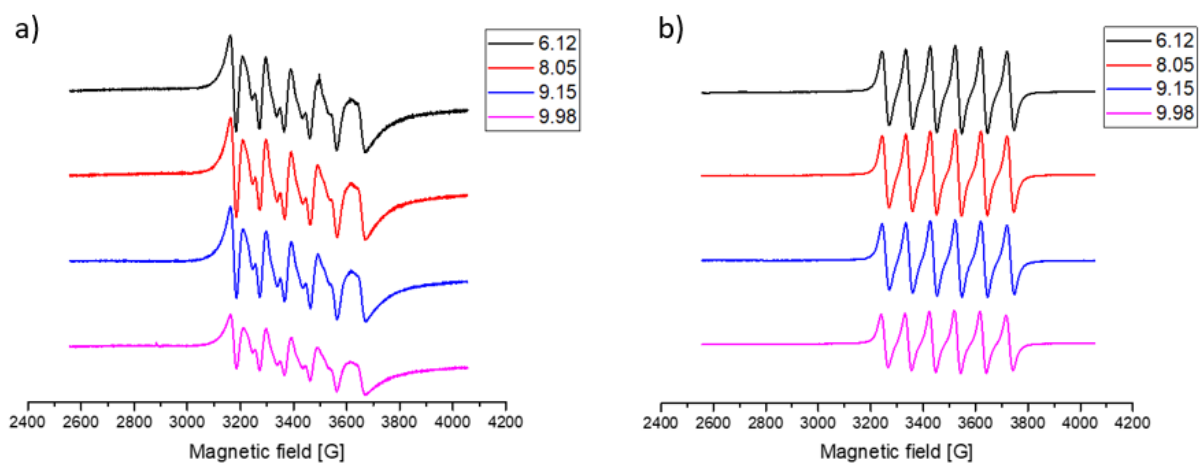

**Figure S15.** EPR spectra of the Mn(II):P2 system as a function of pH in: a) T= 77 K (LN); b) T= 298 K (RT).

## TABLES

**Table S1.** Hydrolysis constants for Mn(II), Zn(II) and Fe(II) ions for  $I=0.1\text{M}$  ionic strength,  $T= 298\text{ K}$ . The hydrolysis constants for zero ionic strength were taken from the “Hydrolysis of Metal Cations” by Brown and Ekberg and calculated to  $0.1\text{ M}$  ionic strength with the formula proposed by Baes and Mesmer in “The Hydrolysis of Cations”.<sup>1,2</sup>

| Species                                | $\log \beta$ |
|----------------------------------------|--------------|
| <b>Mn(II)</b>                          |              |
| <b>Mn(OH)<sup>+</sup></b>              | -10.78       |
| <b>Mn(OH)<sub>2</sub></b>              | -22.39       |
| <b>Mn(OH)<sub>3</sub><sup>-</sup></b>  | -34.34       |
| <b>Mn(OH)<sub>4</sub><sup>2-</sup></b> | -47.82       |
| <b>Zn(II)</b>                          |              |
| <b>Zn(OH)<sup>+</sup></b>              | -9.12        |
| <b>Zn(OH)<sub>2</sub></b>              | -18.08       |
| <b>Zn(OH)<sub>3</sub><sup>-</sup></b>  | -27.97       |
| <b>Zn(OH)<sub>4</sub><sup>2-</sup></b> | -39.50       |
| <b>Fe(II)</b>                          |              |
| <b>Fe(OH)<sup>+</sup></b>              | -9.63        |
| <b>Fe(OH)<sub>2</sub></b>              | -20.73       |
| <b>Fe(OH)<sub>3</sub><sup>-</sup></b>  | -32.68       |

(1) C. F. Baes and R. S. Mesmer: The Hydrolysis of Cations. John Wiley & Sons, New York, London, Sydney, Toronto 1976. 489 Seiten, Preis: £ 18.60. *Berichte der Bunsengesellschaft für physikalische Chemie* **1977**, *81* (2), 245–246. <https://doi.org/10.1002/bbpc.19770810252>.

(2) Brown, P. L.; Ekberg, C. *Hydrolysis of Metal Ions*; John Wiley & Sons, 2016.

**Table S2.** Intensity maxima of the major complexes and adduct ions observed by ESI-MS for each metal:peptide system at pH=7.4, M:L=1:1.

| System    | Ion                                           | m/z<br>experimental | m/z<br>simulated |
|-----------|-----------------------------------------------|---------------------|------------------|
| Fe(II):P1 | $\{[\text{FeH}_3\text{L}]+2\text{H}^+\}^{2+}$ | 582.66              | 582.66           |
|           | $\{[\text{H}_3\text{L}]+2\text{H}^+\}^{2+}$   | 555.70              | 555.69           |
|           | $\{[\text{H}_3\text{L}]+\text{H}^+\}^+$       | 1110.40             | 1110.36          |
| Zn(II):P1 | $\{[\text{ZnH}_3\text{L}]+2\text{H}^+\}^{2+}$ | 586.65              | 586.64           |
|           | $\{[\text{H}_3\text{L}]+2\text{H}^+\}^{2+}$   | 555.70              | 555.69           |
|           | $\{[\text{H}_3\text{L}]+\text{H}^+\}^+$       | 1110.36             | 1110.36          |
| Mn(II):P1 | $\{[\text{MnH}_3\text{L}]+2\text{H}^+\}^{2+}$ | 582.15              | 582.15           |
|           | $\{[\text{H}_3\text{L}]+2\text{H}^+\}^{2+}$   | 555.70              | 555.69           |
|           | $\{[\text{H}_3\text{L}]+\text{H}^+\}^+$       | 1110.37             | 1110.36          |
| Fe(II):P2 | $\{[\text{FeLH}_{-1}]+5\text{H}^+\}^{5+}$     | 689.93              | 689.92           |
|           | $\{[\text{HL}+5\text{H}^+\}^{5+}$             | 679.13              | 679.14           |
|           | $\{[\text{HL}+4\text{H}^+\}^{4+}$             | 848.92              | 848.92           |
|           | $\{[\text{FeLH}_{-1}]+3\text{H}^+\}^{3+}$     | 1131.22             | 1131.23          |
| Zn(II):P2 | $\{[\text{ZnLH}_{-1}]+5\text{H}^+\}^{5+}$     | 691.53              | 691.53           |
|           | $\{[\text{HL}]+5\text{H}^+\}^{5+}$            | 679.14              | 679.14           |
|           | $\{[\text{HL}+4\text{H}^+\}^{4+}$             | 848.93              | 848.92           |
|           | $\{[\text{ZnLH}_{-1}]+3\text{H}^+\}^{3+}$     | 1151.87             | 1151.87          |
|           | $\{[\text{HL}]+3\text{H}^+\}^{3+}$            | 1131.23             | 1131.23          |
| Mn(II):P2 | $\{[\text{MnLH}_{-1}]+5\text{H}^+\}^{5+}$     | 689.72              | 689.72           |
|           | $\{[\text{HL}]+5\text{H}^+\}^{5+}$            | 679.15              | 679.14           |
|           | $\{[\text{HL}]+4\text{H}^+\}^{4+}$            | 848.93              | 848.92           |
|           | $\{[\text{MnLH}_{-1}]+3\text{H}^+\}^{3+}$     | 1148.87             | 1148.87          |
|           | $\{[\text{HL}]+3\text{H}^+\}^{3+}$            | 1131.23             | 1131.23          |
